# Supplementary material
Source: publisher figshare collection journal article supplement (https://acs.figshare.com/ndownloader/files/3954226)
Supplement: Supplementary file 1 [file 3954226]

## Supporting Information

### Carbon Nanotubes as Activating Tyrosinase Supports for the Selective Synthesis of Catechols

Fabiana Subrizi,<sup>†</sup> Marcello Crucianelli,<sup>\*,†</sup> Valentina Grossi,<sup>†</sup> Maurizio Passacantando,<sup>†</sup> Lorenzo Pesci,<sup>‡</sup> and Raffaele Saladino<sup>\*,‡</sup>

<sup>†</sup> Department of Physical and Chemical Sciences, University of L'Aquila, Via Vetoio, I-67100 Coppito (AQ), Italy

<sup>‡</sup> Department of Ecology and Biology, University of Tuscia, Largo dell'Università, 01100 Viterbo (VT), Italy

#### Corresponding Authors

Dr. M. Crucianelli, e-mail: [marcello.crucianelli@univaq.it](mailto:marcello.crucianelli@univaq.it); fax: (+39) 0862-433753

Prof. R. Saladino, e-mail: [saladino@unitus.it](mailto:saladino@unitus.it); fax: (+39) 0761-357242

#### A linear relationship between absorbance *versus* concentration of oxidized carbon nanotubes (ox-MWCNTs)

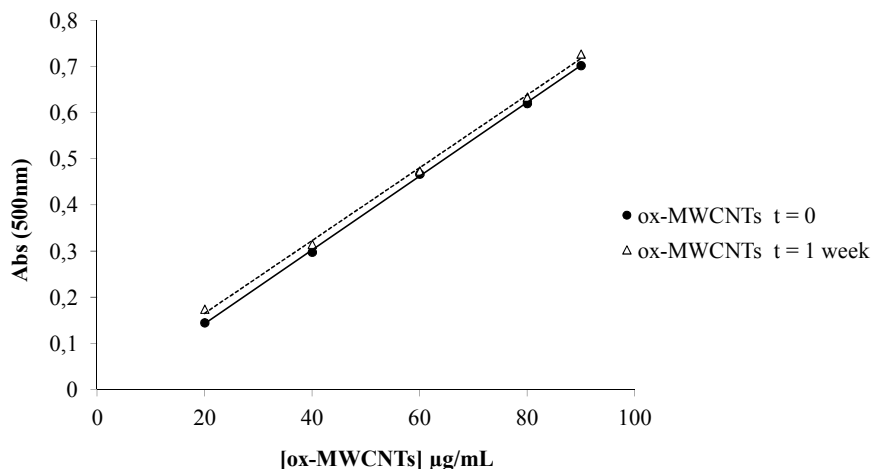

**Figure S1.** Absorbance of a solution of ox-MWCNTs as a function of its concentration: (●) freshly prepared ( $t = 0$ ) and ( $\Delta$ ) after a week of storage ( $t = 1$  week).

### Plot of activity (%) of catalysts I and IV *vs* run

The  $T_{50}$  value, defined as the run number at which the catalyst activity is reduced to 50% , was calculated by linear regressions of the percentage of activity *versus* run. Figures S2 and S3 report data for catalyst I and IV in buffer and organic medium. Tyro/E-LbL catalyst was included as reference.

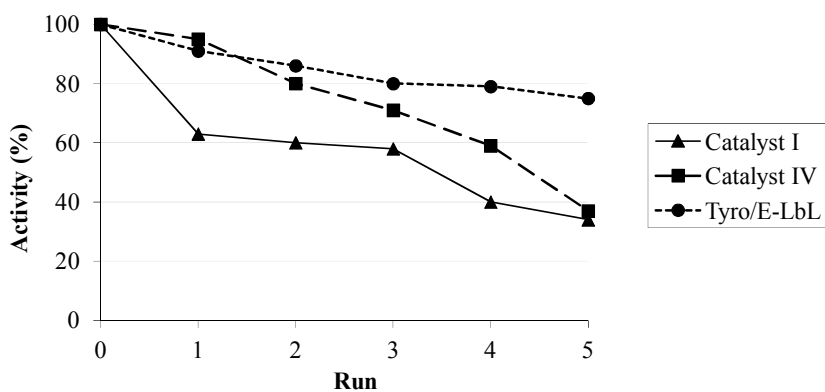

**Figure S2.** Activity (%) of catalyst I and IV *vs* run, in buffer.

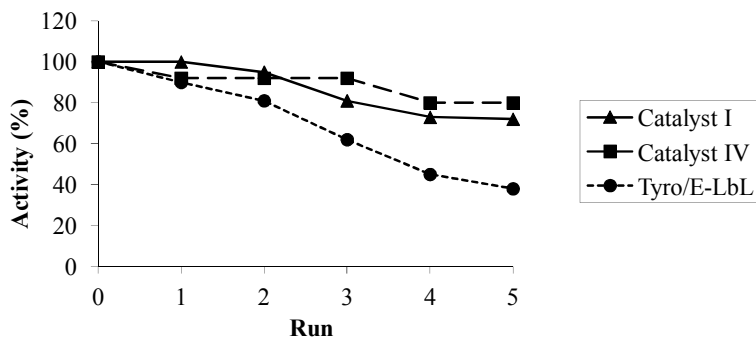

**Figure S3.** Activity (%) of catalyst I and IV *vs* run, in organic medium.

The  $T_{50}$  value for Tyro/E-LbL in buffer and in organic medium was calculated to be 10 and 4 respectively. These data suggest a better stability in water than in organic solvent. For the Catalyst **I** and **IV** an opposite behaviour was established.

**Linear regression equations and plots of Lineweaver-Burk (Figure S4), Eadie-Hofstee (Figure S5) and Hanes (Figure S6)**

$$1/v = 1/V_{\max} + (k_m/V_{\max}) * 1/[para-cresol]$$

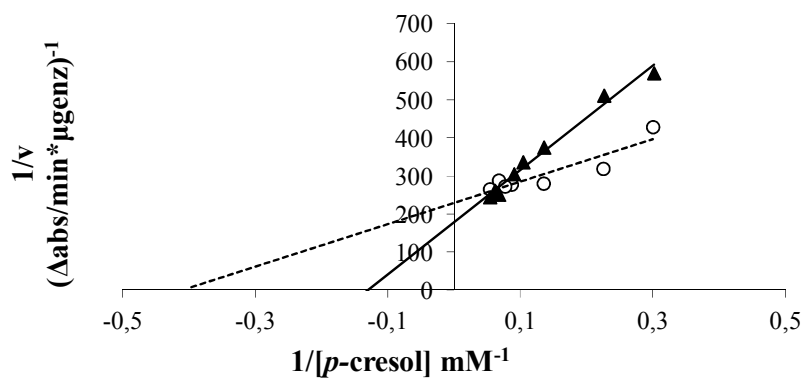

**Figure S4.** Lineweaver-Burk equation and plot for native tyrosinase ( $\circ$ ) and catalyst **I** ( $\blacktriangle$ )

$$v = V_{\max} - v(k_m/[para-cresol])$$

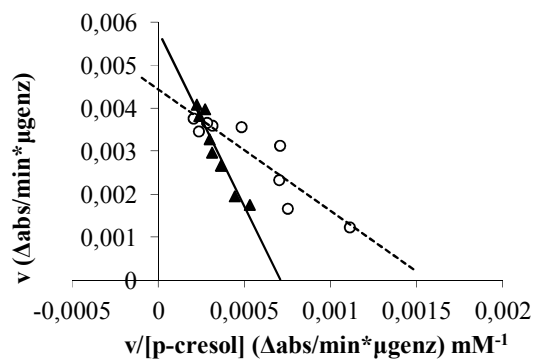

**Figure S5.** Eadie-Hofstee equation and plot for native tyrosinase (○) and catalyst I (▲)

$$[para-cresol]/v = K_m/V_{max} + [para-cresol]/V_{max}$$

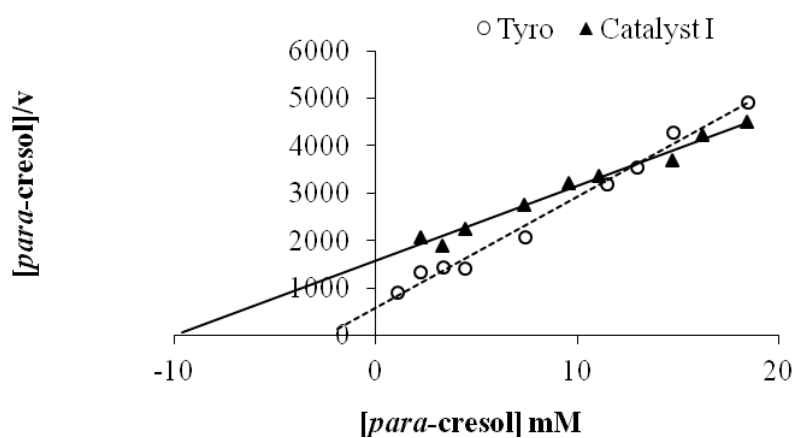

**Figure S6.** Hanes equation and plot for native tyrosinase (○) and catalyst I (▲). The initial velocity (v) was expressed as  $\Delta\text{Abs} \cdot \text{min}^{-1} \cdot \mu\text{g enzyme}^{-1}$

**Non-linear regression plot**

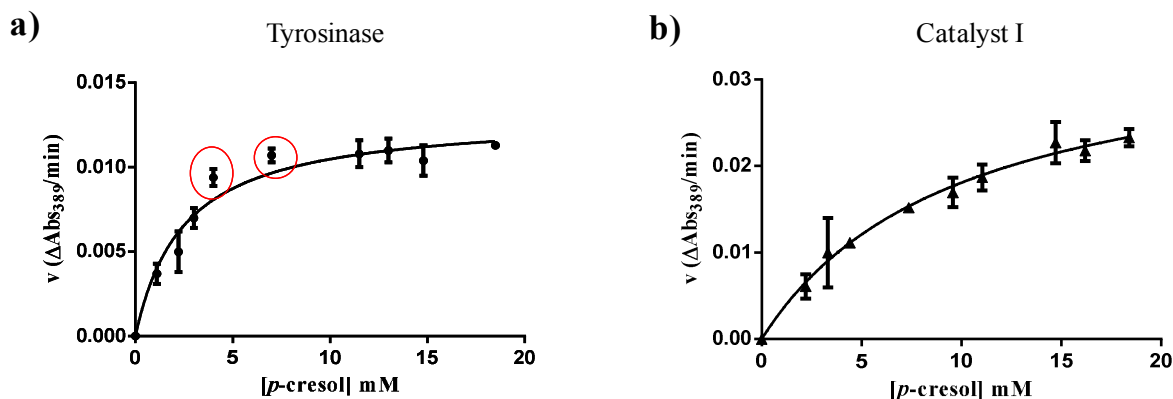

**Figure S7.** Non-linear regression for native tyrosinase (a) and catalyst I (b). Evidenced points were discarded from the regression curve.

### Identification and characterization of oxidation products

All products were identified by  $^1\text{H}$  NMR,  $^{13}\text{C}$  NMR and GC-MS.  $^1\text{H}$  NMR and  $^{13}\text{C}$  NMR were recorded on a Varian Crioprobe 400 MHz spectrometer using  $\text{CDCl}_3$  as solvent. All chemical shift are expressed in parts per million ( $\delta$  scale).<sup>a</sup> GC-MS analysis were performed on a GCMS-QP5050 Shimadzu apparatus using a SPB column (25 m  $\times$  0.25 mm and 0.25 mm film thickness) and an isothermal temperature profile of 100°C for 2 min, followed by a 10 °C/min temperature gradient to 280°C for 25 min. The injector temperature was 280°C. Chromatography-grade helium was used as the carrier gas with a flow of 2.7 mL min<sup>-1</sup>. Mass spectra were recorded with an electron beam of 70 eV. Quantitative analyses were performed using dodecane as internal standard.

**4-Methylcatechol (4-Methyl-1,2-benzenediol) (1a):** Oil.  $^1\text{H}$  NMR<sup>b</sup> (400 MHz,  $\text{CDCl}_3$ )  $\delta_{\text{H}}$  (ppm) 2.24 (3H, s,  $\text{CH}_3$ ), 5.04 (1H, br s, OH), 5.18 (1H, br s, OH), 6.61- 6.76 (3H, m, Ph-H);  $^{13}\text{C}$  NMR<sup>b</sup> (100 MHz,  $\text{CDCl}_3$ )  $\delta_{\text{C}}$  (ppm) 20.8 ( $\text{CH}_3$ ), 115.3 (CH), 116.2 (CH), 121.5 (CH), 131.1 (C), 141.0 (C), 143.3 (C); *MS*, ( $m/z$ ): 268 ( $\text{M}^+$ ), 253 ( $\text{M}-\text{CH}_3$ ), 238 [ $\text{M}-(\text{CH}_3)_2$ ], 223 [ $\text{M}-(\text{CH}_3)_3$ ], 195 [ $\text{M}-\text{Si}(\text{CH}_3)_3$ ], 179 [ $\text{M}-\text{OSi}(\text{CH}_3)_3$ ], 164 [ $\text{M}-\text{OSi}(\text{CH}_3)_4$ ], 149 [ $\text{M}-\text{OSi}(\text{CH}_3)_5$ ], 134 [ $\text{M}-\text{OSi}(\text{CH}_3)_6$ ], 106 [ $\text{M}-\text{OSi}_2(\text{CH}_3)_6$ ], 90 [ $\text{M}-\text{O}_2\text{Si}_2(\text{CH}_3)_6$ ].

**Dimer (1b):** Oil.  $^1\text{H}$  NMR (400 MHz,  $\text{CDCl}_3$ )  $\delta_{\text{H}}$  (ppm) 2.19 (3H, s,  $\text{CH}_3$ ), 2.42 (3H, s,  $\text{CH}_3$ ), 6.51 (3H, br s, OH), 6.61-7.12 (5H, m, Ph-H);  $^{13}\text{C}$  NMR (100 MHz,  $\text{CDCl}_3$ )  $\delta_{\text{C}}$  (ppm) 16.0 ( $\text{CH}_3$ ), 22.1 ( $\text{CH}_3$ ), 116.6 (CH), 118.2 (CH), 122.0 (C), 125.6 (C), 127.0 (CH), 127.2 (C), 131.2 (CH), 133.1 (CH), 136.7 (C), 141.3 (C), 150.1 (C), 158.2 (C); *MS*, *m/z*: 446 ( $\text{M}^+$ ), 431 (M- $\text{CH}_3$ ), 329 [M-Si( $\text{CH}_3$ )<sub>3</sub>], 313 [M-OSi( $\text{CH}_3$ )<sub>3</sub>], 298 [M-OSi( $\text{CH}_3$ )<sub>4</sub>], 268 [M-OSi( $\text{CH}_3$ )<sub>6</sub>], 180 [M-O<sub>2</sub>Si<sub>2</sub>( $\text{CH}_3$ )<sub>6</sub>].

**5,5'-Dimethyl-[1,1'-Biphenyl]-2,2',3,3'-tetrol (1c):** Oil.  $^1\text{H}$  NMR (400 MHz,  $\text{CDCl}_3$ )  $\delta_{\text{H}}$  (ppm) 2.41 (6H, s, 2x $\text{CH}_3$ ), 6.62-6.91 (4H, m, Ph-H);  $^{13}\text{C}$  NMR (100 MHz,  $\text{CDCl}_3$ )  $\delta_{\text{C}}$  (ppm) 22.1 (2x $\text{CH}_3$ ), 117.2 (2xCH), 122.1 (2xC), 132.0 (2xCH), 138.1 (2xC), 141.3 (2xC), 150.3 (2xC); *MS*, *m/z*: 534 ( $\text{M}^+$ ), 519 (M- $\text{CH}_3$ ), 417 [M-Si( $\text{CH}_3$ )<sub>3</sub>], 401 [M-OSi( $\text{CH}_3$ )<sub>3</sub>], 386 [M-OSi( $\text{CH}_3$ )<sub>4</sub>], 371 [M-OSi( $\text{CH}_3$ )<sub>5</sub>], 268 [M-O<sub>2</sub>Si<sub>2</sub>( $\text{CH}_3$ )<sub>6</sub>].

**4-Ethylcatechol (4-ethyl-1,2-Benzenediol) (2a):** Oil.  $^1\text{H}$  NMR<sup>c</sup> (400 MHz,  $\text{CDCl}_3$ )  $\delta_{\text{H}}$  (ppm) 1.04 (3H, m,  $\text{CH}_3$ ), 2.36 (2H, m,  $\text{CH}_2$ ), 6.00-7.25 (3H, m, Ph-H);  $^{13}\text{C}$  NMR (100 MHz,  $\text{CDCl}_3$ )  $\delta_{\text{C}}$  (ppm) 15.2 ( $\text{CH}_3$ ), 28.1 ( $\text{CH}_2$ ), 116.5 (CH), 117.4 (CH), 124.2 (CH), 139.3 (C), 145.7 (C), 148.4 (C); *MS*, *m/z*: 282 ( $\text{M}^+$ ), 267 (M- $\text{CH}_3$ ), 252 [M-( $\text{CH}_3$ )<sub>2</sub>], 237 [M-( $\text{CH}_3$ )<sub>3</sub>], 209 [M-Si( $\text{CH}_3$ )<sub>3</sub>], 193 [M-OSi( $\text{CH}_3$ )<sub>3</sub>], 179 [M-OSi( $\text{CH}_3$ )<sub>4</sub>], 164 [M-OSi( $\text{CH}_3$ )<sub>5</sub>], 148 [M-OSi( $\text{CH}_3$ )<sub>6</sub>], 120 [M-OSi<sub>2</sub>( $\text{CH}_3$ )<sub>6</sub>].

**Dimer (2b):** Oil.  $^1\text{H}$  NMR (400 MHz,  $\text{CDCl}_3$ )  $\delta_{\text{H}}$  (ppm) 1.21 (3H, m,  $\text{CH}_3$ ), 1.32 (3H, m,  $\text{CH}_3$ ), 2.71 (2H, m,  $\text{CH}_2$ ), 2.82 (2H, m,  $\text{CH}_2$ ), 6.4-7.2 (5H, m, Ph-H);  $^{13}\text{C}$  NMR (100 MHz,  $\text{CDCl}_3$ )  $\delta_{\text{C}}$  (ppm) 15.2 ( $\text{CH}_3$ ), 15.7 ( $\text{CH}_3$ ), 27.2 ( $\text{CH}_2$ ), 28.3 ( $\text{CH}_2$ ), 106.4 (C), 107.2 (C), 112.3 (CH), 114.1 (CH), 128.3 (C), 130.1 (CH), 134.1 (CH), 134.6 (C), 135.1 (C), 136.2 (CH), 143.1 (C), 155.2 (C); *MS*, *m/z*: 474 ( $\text{M}^+$ ), 459 (M- $\text{CH}_3$ ), 429 (M- $\text{CH}_3$ )<sub>3</sub>, 341 [M-OSi( $\text{CH}_3$ )<sub>3</sub>], 326 [M-OSi( $\text{CH}_3$ )<sub>4</sub>], 311 [M-OSi( $\text{CH}_3$ )<sub>5</sub>].

**4-sec-Butylcatechol (4-(1-methylpropyl)-1,2-Benzenediol) (3a):** Oil.  $^1\text{H}$  NMR (400 MHz,  $\text{CDCl}_3$ )  $\delta_{\text{H}}$  (ppm) 1.33 (9H, s,  $\text{CH}_3$ ), 6.63-7.11 (3H, m, Ph-H);  $^{13}\text{C}$  NMR (100 MHz,  $\text{CDCl}_3$ )  $\delta_{\text{C}}$  (ppm) 31.2 (3x $\text{CH}_3$ ), 34.5 (C), 116.5 (CH), 116.9 (CH), 122 (CH), 144.3 (C), 146.2 (C), 147.1 (C); *MS*, *m/z*: 310 ( $\text{M}^+$ ), 295 (M- $\text{CH}_3$ ), 280 [M-( $\text{CH}_3$ )<sub>2</sub>], 237 [M-Si( $\text{CH}_3$ )<sub>3</sub>], 222 [M-OSi( $\text{CH}_3$ )<sub>3</sub>], 207 [M-OSi( $\text{CH}_3$ )<sub>4</sub>], 192 [M-OSi( $\text{CH}_3$ )<sub>5</sub>], 149 [M-OSi<sub>2</sub>( $\text{CH}_3$ )<sub>6</sub>], 133 [M-O<sub>2</sub>Si<sub>2</sub>( $\text{CH}_3$ )<sub>6</sub>].

**4-tert-Butylcatechol (4-tert-Butylbenzene-1,2-diol) (4a):** Oil.  $^1\text{H}$ NMR (400 MHz,  $\text{CDCl}_3$ )  $\delta_{\text{H}}$  (ppm) 1.10 (3H, m,  $\text{CH}_3$ ), 1.22 (3H, m,  $\text{CH}_3$ ), 1.53 (2H, m,  $\text{CH}_2$ ), 3.23 (1H, m, CH), 6.52-6.84 (3H, m, Ph-H);  $^{13}\text{C}$ NMR (100 MHz,  $\text{CDCl}_3$ )  $\delta_{\text{C}}$  (ppm) 11.2 ( $\text{CH}_3$ ), 22.3 ( $\text{CH}_3$ ), 31.2 ( $\text{CH}_2$ ), 43.1 (CH), 113.3 (CH), 114.1 (CH), 124.4 (CH), 136.2 (C), 145.1 (C), 147.0 (C); *MS*, *m/z*: 310 ( $\text{M}^+$ ), 295 (M-

CH<sub>3</sub>), 280 [M-(CH<sub>3</sub>)<sub>2</sub>], 265 [M-(CH<sub>3</sub>)<sub>3</sub>], 237 [M-Si(CH<sub>3</sub>)<sub>3</sub>], 222 [M-OSi(CH<sub>3</sub>)<sub>3</sub>], 207 [M-OSi(CH<sub>3</sub>)<sub>4</sub>], 192 [M-OSi(CH<sub>3</sub>)<sub>5</sub>], 176 [M-OSi(CH<sub>3</sub>)<sub>6</sub>], 148 [M-OSi<sub>2</sub>(CH<sub>3</sub>)<sub>6</sub>].

### References:

- a) Guazzaroni, M.; Pasqualini, M.; Botta, G.; Saladino, R. *ChemCatChem* **2012**, 4, 89.
- b) Chernyak, N.; Dudnik, A. S.; Huang, C.; Gevorgyan, V. *J. Am. Chem. Soc.* **2010**, 132, 8270.
- c) Nakayama, S.; Ikeda, F. *US Patent* 5102906, 4985458, **1988**.
